# Supplementary material for: Limited Effects of Precipitation Manipulation on Soil Respiration and Inorganic N Concentrations across Soil Drainage Classes in Northern Minnesota Aspen Forests
Source: MDPI journal article supplement (doi:10.3390/f13081194), 2022-07-28
Supplement: s1 [file s1]

# Limited effects of precipitation manipulation on soil respiration and inorganic N concentrations across soil drainage classes in northern Minnesota aspen forests

Anna B. Stockstad <sup>a\*</sup>, Robert A. Slesak <sup>b</sup>, Alan J. Toczydlowski <sup>a</sup>, Charles R. Blinn <sup>a</sup>, Randall K. Kolka <sup>c</sup>, Stephen D. Sebestyen <sup>c</sup>

<sup>a</sup> Department of Forest Resources, University of Minnesota – Twin Cities, St. Paul, MN 55108, USA

<sup>b</sup> Pacific Northwest Research Station, US Forest Service, Olympia, WA 98512, USA

<sup>c</sup> Northern Research Station, US Forest Service, Grand Rapids, MN 55714, USA

## SUPPLEMENTAL MATERIALS

This study investigated the effect of reduced precipitation on soil respiration and nitrogen dynamics via combined throughfall reduction and snow removal in aspen forests of northern Minnesota, USA. Throughfall reduction (50%) was applied during the growing seasons of 2020 and 2021, and snow removal was conducted during the winters of 2019/20 and 2020/21. Soil water content and temperature, *in situ* bulk soil respiration, and extractable inorganic nitrogen concentrations were measured during 2020 and 2021, and a laboratory incubation was conducted to measure soil respiration under controlled conditions.

**Table S1:** Mean percentages of pre-treatment carbon and nitrogen by site and drainage class.

| Drainage<br>class | Location |      |        |      |           |      |
|-------------------|----------|------|--------|------|-----------|------|
|                   | Aitkin   |      | Itasca |      | St. Louis |      |
|                   | %C       | %N   | %C     | %N   | %C        | %N   |
| <b>WD</b>         | 1.27     | 0.07 | 0.73   | 0.04 | 1.24      | 0.08 |
| <b>MWD</b>        | 1.24     | 0.07 | 1.07   | 0.06 | 1.90      | 0.13 |
| <b>SPD</b>        | 1.62     | 0.10 | 0.82   | 0.05 | 3.25      | 0.22 |
| <b>PD</b>         | 1.94     | 0.14 | 1.12   | 0.08 | 5.25      | 0.39 |

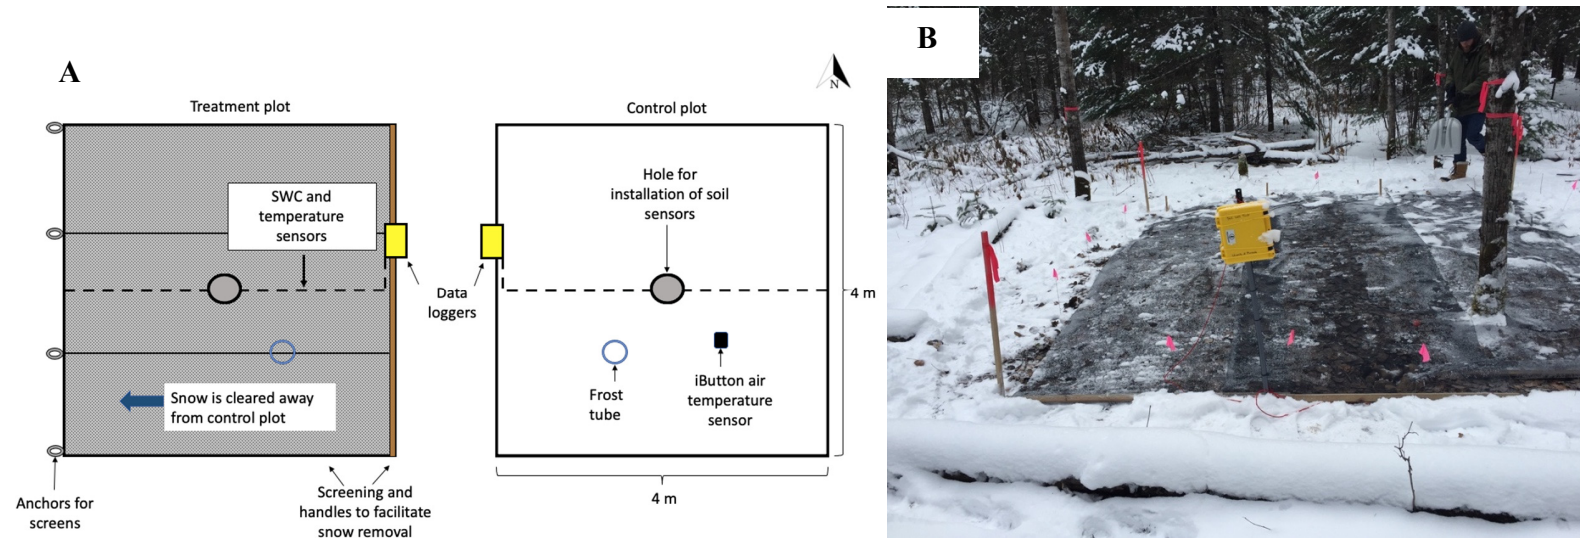

**Figure S1:** Paired-plot design schematic (panel A) and field photo (panel B) with snow removal treatment during the winter. (Photo credit: Alan Toczydlowski, University of Minnesota)

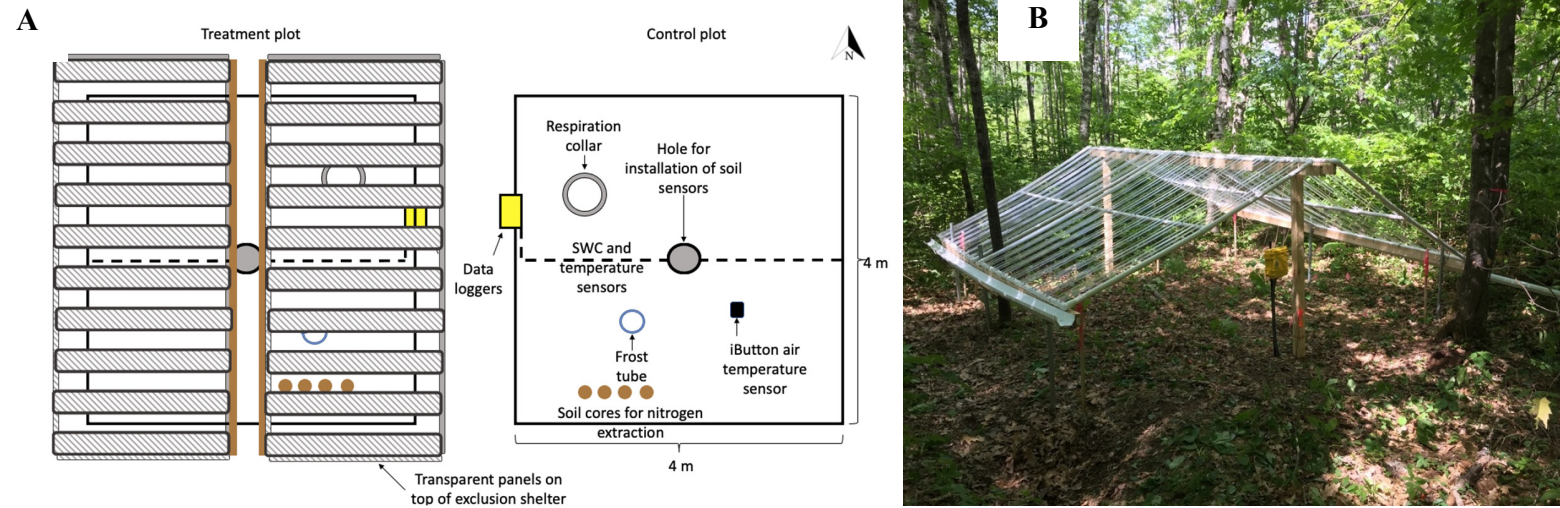

**Figure S2:** Paired-plot design with throughfall reduction treatment during the growing season is shown in panel A. All plots and transparent roof panels were oriented on an east-west transect, with the shelter ridgeline running north-south. Precipitation reduction shelters were designed to exclude 50% of throughfall. Plots that received treatment were randomized in each pair. Panel B shows the throughfall exclusion shelter on a treatment plot during the growing season. (Photo credit: Alan Toczydlowski)

**Table S2:** Four-way ANOVA summary for soil water content models for the growing seasons of 2020 and 2021. Model coefficient p-values are shown. Bolded values indicate a significant result (p-value < 0.05).

|                               | 2020    | 2021    |
|-------------------------------|---------|---------|
| Model term                    | p-value | p-value |
| Intercept                     | <0.001  | <0.001  |
| Drainage                      | <0.001  | <0.001  |
| Treatment                     | 0.338   | <0.001  |
| Week                          | <0.001  | <0.001  |
| Depth                         | <0.001  | 0.220   |
| Drainage:Treatment            | <0.001  | <0.001  |
| Drainage:Week                 | 0.941   | <0.001  |
| Treatment:Week                | 0.650   | 0.399   |
| Drainage:Depth                | <0.001  | <0.001  |
| Treatment:Depth               | <0.001  | <0.001  |
| Week:Depth                    | 1.000   | 0.974   |
| Drainage:Treatment:Week       | 1.000   | 1.000   |
| Drainage:Treatment:Depth      | <0.001  | <0.001  |
| Drainage:Week:Depth           | 1.000   | 1.000   |
| Treatment:Week:Depth          | 1.000   | 1.000   |
| Drainage:Treatment:Week:Depth | 1.000   | 1.000   |

**Table S3:** Four-way ANOVA summary for soil temperature models for the growing seasons of 2020 and 2021. Model coefficient p-values are shown. Bolded values indicate a significant result (p-value < 0.05).

|                               | <b>2020</b>      | <b>2021</b>      |
|-------------------------------|------------------|------------------|
|                               | 05/03-<br>10/25  | 05/02-09/05      |
| Model term                    | p-value          | p-value          |
| Intercept                     | <b>&lt;0.001</b> | <b>&lt;0.001</b> |
| Drainage                      | <b>&lt;0.001</b> | <b>&lt;0.001</b> |
| Treatment                     | <b>&lt;0.001</b> | <b>&lt;0.001</b> |
| Week                          | <b>&lt;0.001</b> | <b>&lt;0.001</b> |
| Depth                         | <b>&lt;0.001</b> | <b>&lt;0.001</b> |
| Drainage:Treatment            | <b>&lt;0.001</b> | <b>&lt;0.001</b> |
| Drainage:Week                 | <b>&lt;0.001</b> | <b>&lt;0.001</b> |
| Treatment:Week                | <b>&lt;0.001</b> | <b>&lt;0.001</b> |
| Drainage:Depth                | <b>&lt;0.001</b> | <b>&lt;0.001</b> |
| Treatment:Depth               | 0.135            | 0.005            |
| Week:Depth                    | <b>&lt;0.001</b> | 0                |
| Drainage:Treatment:Week       | <b>&lt;0.001</b> | 0.151            |
| Drainage:Treatment:Depth      | 0.205            | 0.579            |
| Drainage:Week:Depth           | 1                | 1                |
| Treatment:Week:Depth          | 1.00             | 1                |
| Drainage:Treatment:Week:Depth | 1                | 1                |

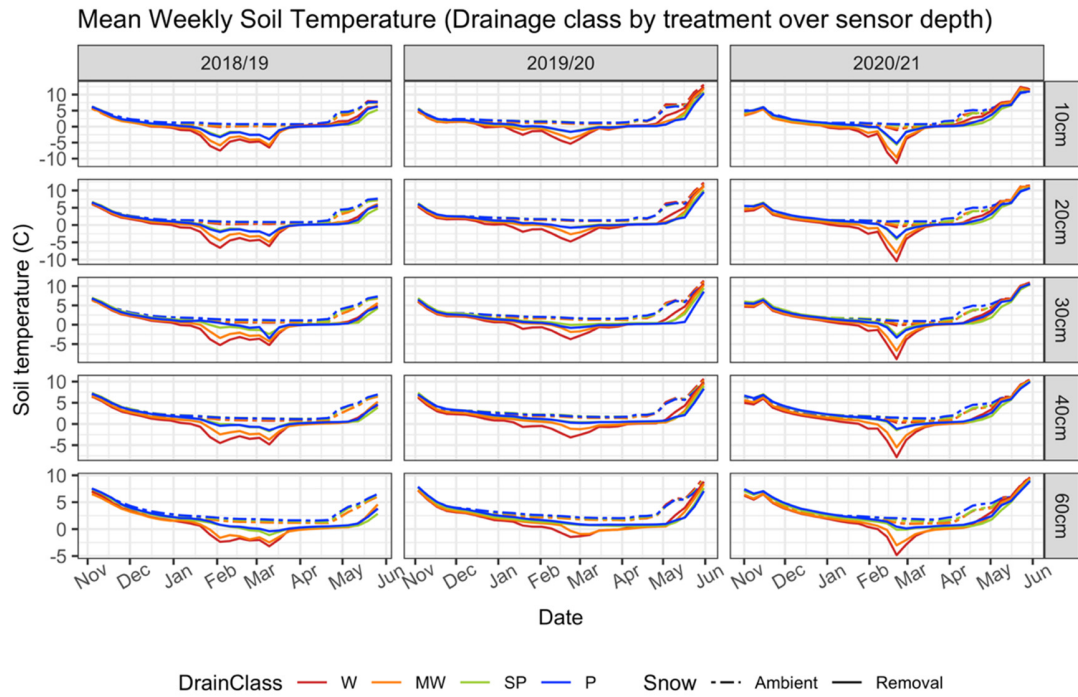

**Figure S3:** Mean weekly soil temperature during the winters of 2018/19, 2019/20, and 2020/21 across drainage class, treatment, depth, and week.

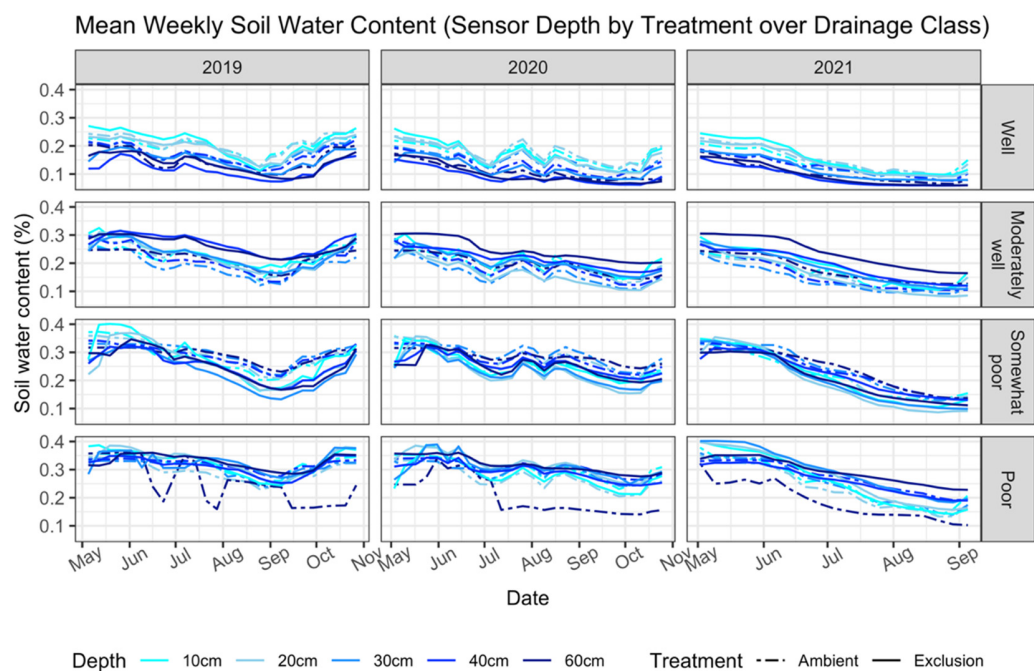

**Figure S4:** Mean weekly soil water content during the growing seasons of 2019, 2020, and 2021 by drainage class, treatment, and depth.



**Table S4:** Three-way ANOVA results summary for the field bulk soil respiration model. Numerator degrees of freedom and model coefficient p-values are shown. Bolded values indicate a significant result (p-value < 0.05).

|                         | <b>2020</b>               |                  | <b>2021</b>               |                  |
|-------------------------|---------------------------|------------------|---------------------------|------------------|
|                         | 06/23 - 09/01             |                  | 04/07 - 08/24             |                  |
| <b>Model term</b>       | <b>Degrees of freedom</b> | <b>p-value</b>   | <b>Degrees of freedom</b> | <b>p-value</b>   |
| Intercept               | 1                         | <b>&lt;0.001</b> | 1                         | <b>&lt;0.001</b> |
| Drainage                | 3                         | 0.091            | 3                         | <b>0.006</b>     |
| Treatment               | 1                         | 0.207            | 1                         | 0.893            |
| Date                    | 5                         | <b>&lt;0.001</b> | 10                        | <b>&lt;0.001</b> |
| Temperature             | 1                         | <b>0.003</b>     | 1                         | 0.599            |
| Percent clay            | 1                         | 0.477            | 1                         | 0.670            |
| Pretreatment carbon     | 1                         | <b>0.001</b>     | 1                         | 0.350            |
| Drainage:Treatment      | 3                         | 0.054            | 3                         | 0.661            |
| Drainage:Date           | 15                        | 0.375            | 30                        | 0.087            |
| Treatment:Date          | 5                         | 0.745            | 10                        | 0.359            |
| Drainage:Treatment:Date | 15                        | 0.991            | 30                        | 0.940            |

**Table S5:** Mean soil respiration, total nitrogen, ammonium, and nitrate/nitrite for summers of 2020 and 2021. Superscript letters indicate significant differences between means within a given year. Level of significance (alpha) is 0.05. Confidence intervals are 95% confidence.

|                 |                                       | 2020              |                     | 2021              |                     |
|-----------------|---------------------------------------|-------------------|---------------------|-------------------|---------------------|
|                 | Units                                 | Mean              | Confidence interval | Mean              | Confidence interval |
| Respiration     | $\mu\text{mol m}^{-2} \text{ s}^{-1}$ | 6.96 <sup>a</sup> | 5.75 - 8.41         | 4.26 <sup>b</sup> | 3.71 - 4.90         |
| Total nitrogen  | $\text{mg}^{-1} \text{ kg}^{-1}$      | 7.61 <sup>a</sup> | 5.31 - 10.8         | 13.3 <sup>b</sup> | 9.49 - 18.7         |
| Ammonium        | $\text{mg}^{-1} \text{ kg}^{-1}$      | 2.97 <sup>a</sup> | 1.17 - 7.61         | 12.9 <sup>b</sup> | 5.05 - 33.1         |
| Nitrate/nitrite | $\text{mg}^{-1} \text{ kg}^{-1}$      | 3.03 <sup>a</sup> | 1.19 - 7.69         | 5.10 <sup>b</sup> | 2.05 - 12.8         |

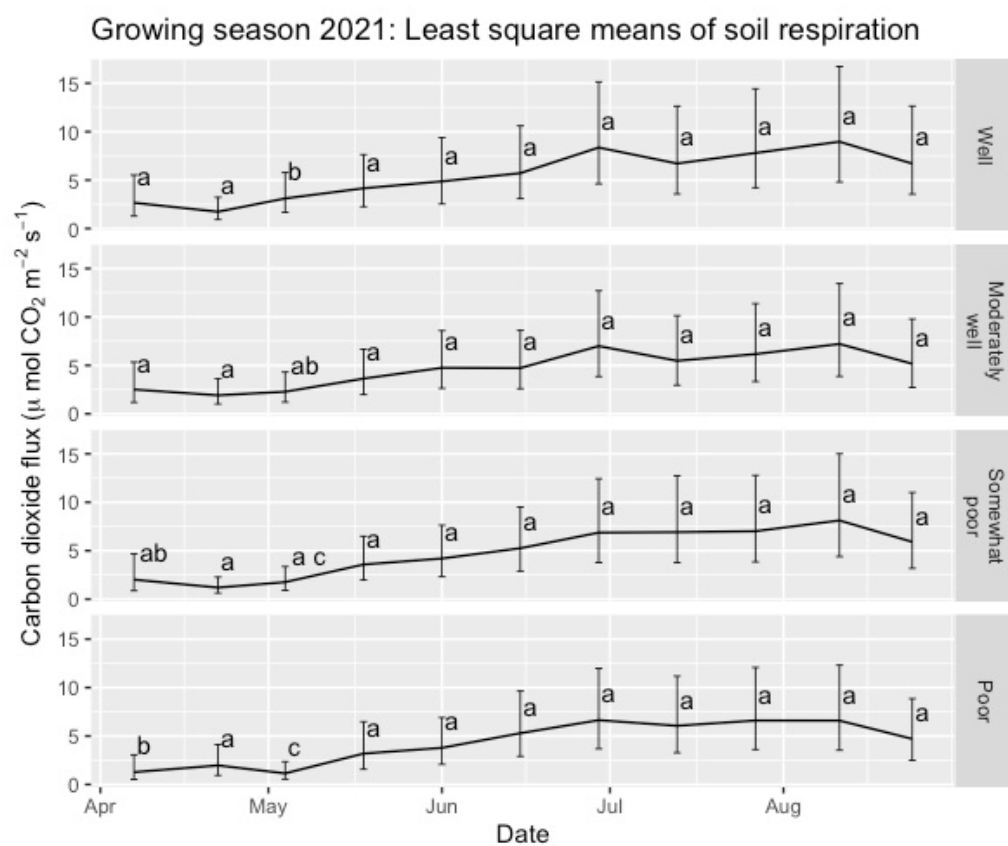

**Figure S5:** Soil respiration during 2021 across time and drainage classes. Letters indicate significant differences (p-value < 0.05).

Growing season 2021: Least square means of extractable ammonium

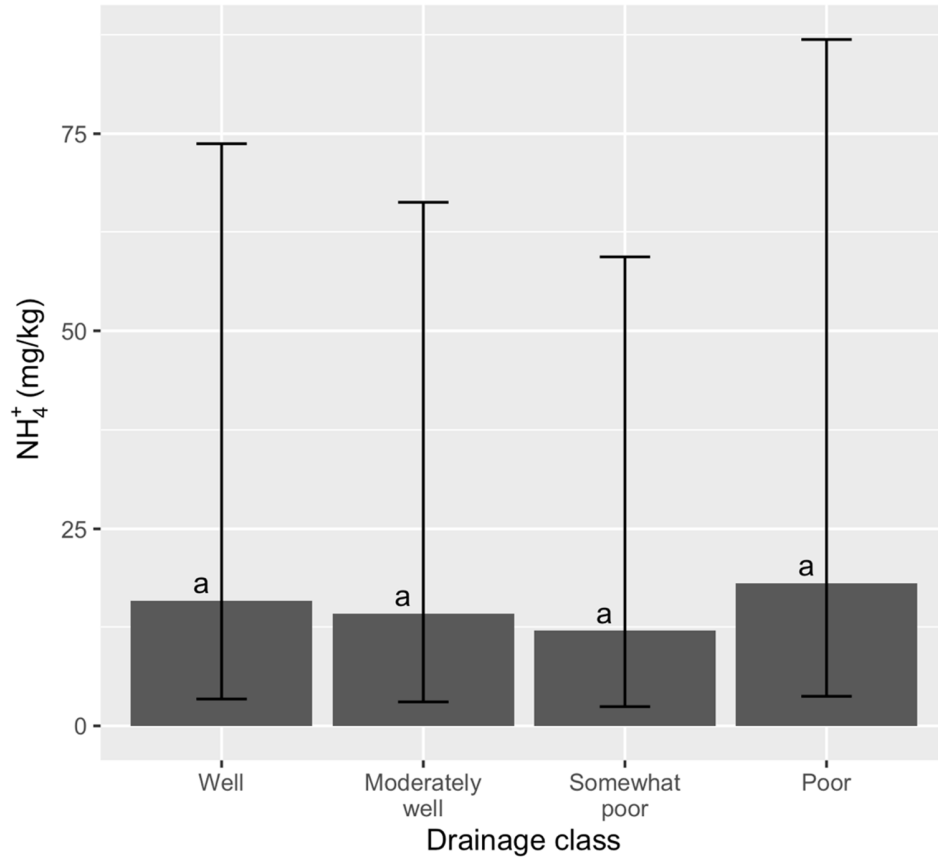

**Figure S6:** Least square mean values of extractable ammonium across drainage classes for 2021. Letters indicate significant differences between drainage classes (p-value < 0.05). Error bars represent 95% confidence intervals.

**Table S6:** Three-way ANOVA results for total nitrogen, ammonium, and nitrate/nitrite models. Pre-treatment nitrogen and percent clay were included as covariates in the models. Bolded values indicate a significant result (p-value < 0.05).

| Model term              | Total nitrogen   |                  | Ammonium         |                  | Nitrate/nitrite  |                  |
|-------------------------|------------------|------------------|------------------|------------------|------------------|------------------|
|                         | 2020             | 2021             | 2020             | 2021             | 2020             | 2021             |
|                         | p-value          | p-value          | p-value          | p-value          | p-value          | p-value          |
| Intercept               | <b>&lt;0.001</b> | <b>&lt;0.001</b> | <b>&lt;0.001</b> | <b>&lt;0.001</b> | <b>&lt;0.001</b> | <b>&lt;0.001</b> |
| Drainage                | <b>&lt;0.001</b> | <b>&lt;0.001</b> | <b>0.014</b>     | 0.372            | <b>&lt;0.001</b> | <b>&lt;0.001</b> |
| Treatment               | 0.096            | 0.954            | 0.782            | 0.364            | 0.170            | 0.080            |
| Date                    | 0.139            | <b>&lt;0.001</b> | <b>&lt;0.001</b> | <b>&lt;0.001</b> | <b>&lt;0.001</b> | <b>&lt;0.001</b> |
| lnpretN                 | <b>0.008</b>     | 0.094            | 0.548            | 0.081            | 0.984            | 0.322            |
| percentClay             | 0.797            | 0.545            | 0.159            | 0.831            | 0.458            | <b>0.016</b>     |
| Drainage:Treatment      | 0.222            | 0.053            | 0.632            | 0.569            | 0.068            | 0.495            |
| Drainage>Date           | 0.662            | 0.067            | 0.423            | <b>0.025</b>     | 0.296            | 0.413            |
| Treatment>Date          | 0.331            | 0.347            | 0.918            | 0.460            | 0.651            | 0.888            |
| Drainage:Treatment>Date | 0.818            | 0.311            | 0.915            | 0.754            | 0.162            | 0.763            |

### *Vegetation communities*

There were no significant differences in species richness or diversity between treatments or drainage classes (Supplemental materials Table S6). There were few clear patterns in species richness between treatments and among drainage classes. Control plots had a higher species richness than treatment plots for all but the St. Louis County sites (Supplemental Materials Table S8). The somewhat-poorly drained class had the highest species richness, followed by WD, MWD, and then PD (Supplemental Materials Table S8). There were also few consistent trends in Shannon's Diversity Index (SDI) across the plots (Supplemental Materials Table S9).

**Table S7:** Two-way ANOVA summaries of mixed models of species richness and Shannon's Diversity Index for 2021 vegetation community surveys. Site was included as a random variable in the models. Numerator degrees of freedom are shown. Bolded values denote significant result (p-value < 0.05).

| Model Term         | Degrees of freedom | Species richness | Shannon's Diversity Index |
|--------------------|--------------------|------------------|---------------------------|
|                    |                    | p-value          | p-value                   |
| Intercept          | 1                  | <b>&lt;0.001</b> | <b>&lt;0.001</b>          |
| Drainage           | 3                  | 0.4467           | 0.2953                    |
| Treatment          | 1                  | 0.8587           | 0.6819                    |
| Drainage:Treatment | 3                  | 0.4716           | 0.1663                    |

**Table S8:** Species richness (number of species) for all plots by location.

| <b>Drainage<br/>class</b> | <b>Aitkin</b>  |                  | <b>Itasca</b>  |                  | <b>St. Louis</b> |                  |
|---------------------------|----------------|------------------|----------------|------------------|------------------|------------------|
|                           | <b>Control</b> | <b>Treatment</b> | <b>Control</b> | <b>Treatment</b> | <b>Control</b>   | <b>Treatment</b> |
| WD                        | 13             | 12               | 10             | 11               | 8                | 13               |
| MWD                       | 9              | 11               | 13             | 11               | 7                | 9                |
| SPD                       | 10             | 9                | 15             | 15               | 11               | 10               |
| PD                        | 12             | 6                | 10             | 9                | 11               | 11               |
| Total                     | <b>44</b>      | <b>38</b>        | <b>48</b>      | <b>46</b>        | <b>37</b>        | <b>43</b>        |

**Table S9:** Shannon's Diversity Index for all plots by location.

| <b>Drainage<br/>Class</b> | <b>Aitkin</b>  |                  | <b>Itasca</b>  |                  | <b>St. Louis</b> |                  |
|---------------------------|----------------|------------------|----------------|------------------|------------------|------------------|
|                           | <b>Control</b> | <b>Treatment</b> | <b>Control</b> | <b>Treatment</b> | <b>Control</b>   | <b>Treatment</b> |
| WD                        | 2.87           | 2.83             | 2.93           | 2.69             | 2.27             | 2.92             |
| MWD                       | 2.04           | 2.95             | 2.96           | 2.52             | 2.07             | 2.65             |
| SPD                       | 2.88           | 2.62             | 3.16           | 3.25             | 2.85             | 2.29             |
| PD                        | 2.76           | 1.93             | 2.80           | 2.47             | 2.80             | 2.63             |



**Table S10:** Four-way ANOVA results for carbon dioxide model. Numerator degrees of freedom and model coefficient p-values are shown. Bolded values indicate a significant result (p-value < 0.05).

|                                          |                    | Carbon dioxide   |
|------------------------------------------|--------------------|------------------|
| Model term                               | Degrees of freedom | p-value          |
| Intercept                                | 1                  | <b>&lt;0.001</b> |
| Drainage                                 | 3                  | <b>0.004</b>     |
| Treatment                                | 1                  | 0.438            |
| H2O added                                | 2                  | <b>&lt;0.001</b> |
| Sample date                              | 1                  | <b>&lt;0.001</b> |
| Drainage:Treatment                       | 3                  | 0.740            |
| Drainage:H2O added                       | 6                  | 0.949            |
| Treatment:H2O added                      | 2                  | 0.240            |
| Drainage:Sample Date                     | 3                  | 0.189            |
| Treatment:Sample Date                    | 1                  | 0.956            |
| H2O added:Sample Date                    | 2                  | <b>&lt;0.001</b> |
| Drainage:Treatment:H2O added             | 6                  | 0.917            |
| Drainage:Treatment:Sample Date           | 3                  | 0.942            |
| Drainage:H2O added:Sample Date           | 6                  | 0.974            |
| Treatment:H2O_added:Sample Date          | 2                  | 0.561            |
| Drainage:Treatment:H2O added:Sample Date | 6                  | 0.918            |
