# Supplementary material for: Limited Effects of Precipitation Manipulation on Soil Respiration and Inorganic N Concentrations across Soil Drainage Classes in Northern Minnesota Aspen Forests
Source: MDPI journal article supplement (doi:10.3390/f13081194), 2022-07-28
Supplement: s1 [file s1]

Archive with 1 entries (1 files):
- forests-1784705-supplementary.pdf
